# Supplementary material for: Biostimulatory Action of a Plant-Derived Protein Hydrolysate on Morphological Traits, Photosynthetic Parameters, and Mineral Composition of Two Basil Cultivars Grown Hydroponically under Variable Electrical Conductivity
Source: MDPI journal article supplement (doi:10.3390/horticulturae8050409), 2022-05-06
Supplement: s1 [file s1]

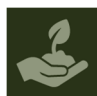

Table S1. Trainer ® Composition

|                                                     |                                                  |
|-----------------------------------------------------|--------------------------------------------------|
| Density                                             | 1.21 kg L <sup>-1</sup>                          |
| Dry matter                                          | 46%                                              |
| pH                                                  | 4.0                                              |
| Free amino acids and soluble peptides               | 310 g kg <sup>-1</sup>                           |
| FRAP antioxidant activity                           | 41.9 mmol Fe <sup>2+</sup> g <sup>-1</sup> f.w.  |
| Total phenolics                                     | 8.93 mg of gallic acid eq. per g of f.w. product |
| Total flavonoids                                    | 0.95 mg of quercetin eq. per g of f.w. product   |
| Soluble sugars                                      | 90 g kg <sup>-1</sup> f.w.                       |
| N–NO <sub>3</sub>                                   | 3.13 µg g <sup>-1</sup> f.w.                     |
| N–NH <sub>4</sub>                                   | 6.00 µg g <sup>-1</sup> f.w.                     |
| Phytohormones                                       | ND                                               |
| <b>Mineral composition (g kg<sup>-1</sup> f.w.)</b> |                                                  |
| N                                                   | 50.0                                             |
| P                                                   | 0.9                                              |
| K                                                   | 41.1                                             |
| Ca                                                  | 10.9                                             |
| Mg                                                  | 0.5                                              |
| Fe                                                  | 0.024                                            |
| Zn                                                  | 0.010                                            |
| Mn                                                  | 0.001                                            |
| B                                                   | 0.005                                            |
| Cu                                                  | 0.001                                            |
| <b>Aminogram (g kg<sup>-1</sup> f.w.)</b>           |                                                  |
| Ala                                                 | 12                                               |
| Arg                                                 | 19                                               |
| Asp                                                 | 33                                               |
| Cys                                                 | 4                                                |
| Glu                                                 | 54                                               |
| Gly                                                 | 13                                               |
| His                                                 | 8                                                |
| Ile                                                 | 12                                               |
| Leu                                                 | 24                                               |
| Lys                                                 | 19                                               |
| Met                                                 | 4                                                |
| Phe                                                 | 16                                               |
| Pro                                                 | 15                                               |
| Ser                                                 | 17                                               |
| Thr                                                 | 11                                               |
| Trp                                                 | 4                                                |
| Tyr                                                 | 13                                               |
| Val                                                 | 16                                               |
